# Supplementary material for: Estrogen-Related Receptor γ Agonist DY131 Ameliorates Lipopolysaccharide-Induced Acute Liver Injury
Source: PubMed Central journal article supplement (PMC8104008; doi:10.3389/fphar.2021.626166), 2021-04-23
Supplement: datasheet1.pdf [file datasheet1.pdf]

**Fig 1 B**

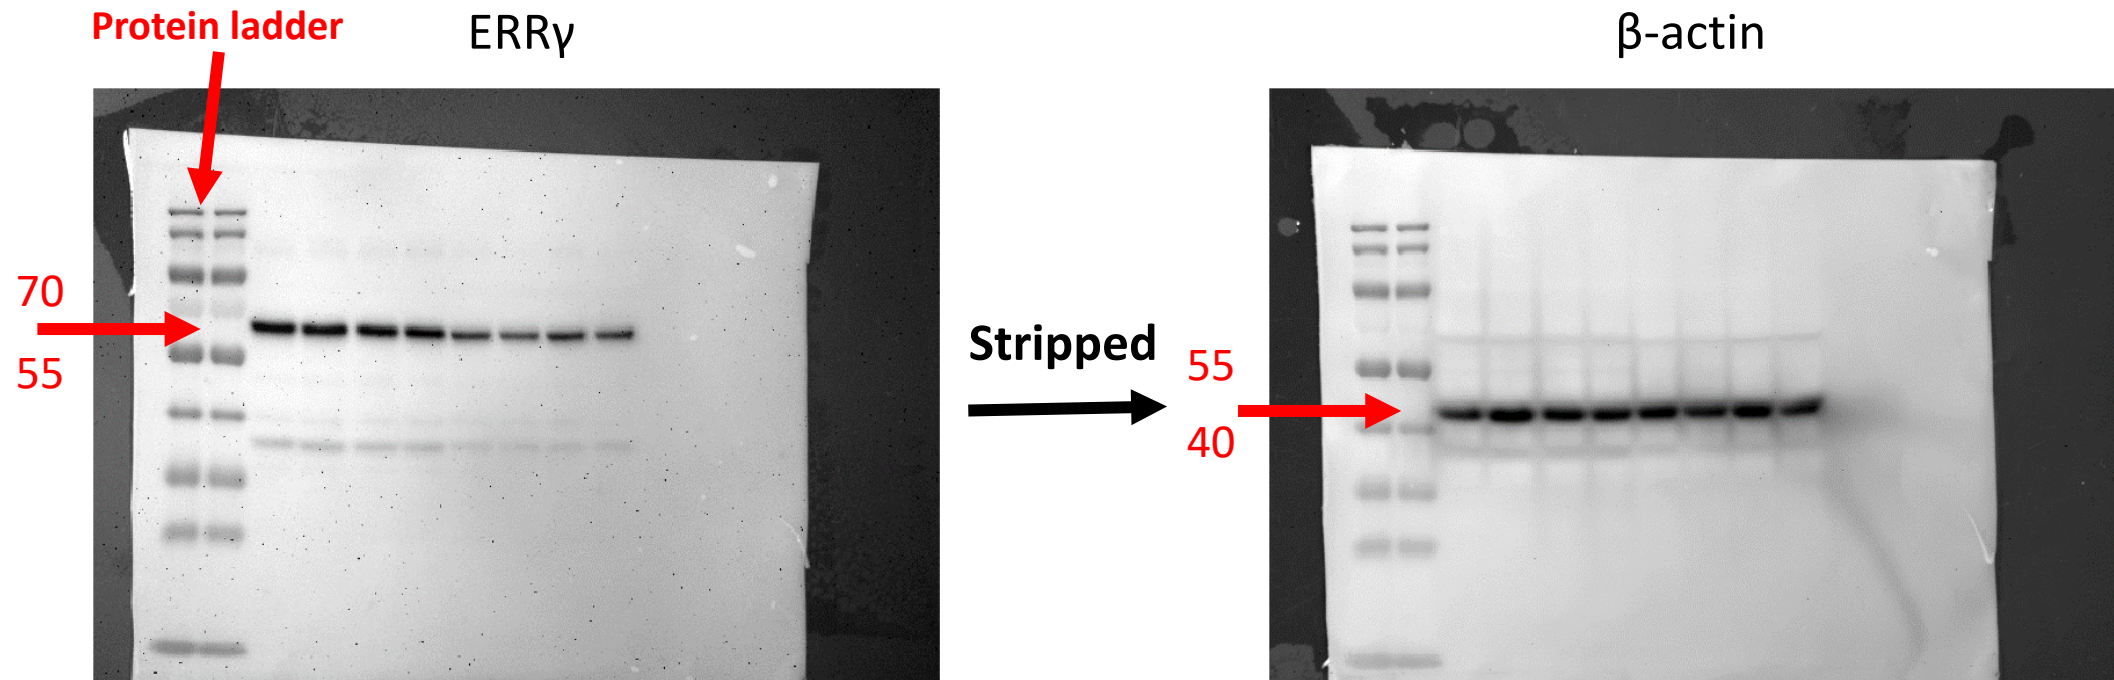

**7.5% PAGE Gel**

**PVDF1 Sample order:** protein ladder1/2, control 1/2/3/4, LPS 1/2/3/4

Products: PageRuler prestained protein ladder (thermo scientific 26616)

Stripping buffer (beyotime P0025)

**Fig 1 B**

ERR $\gamma$

$\beta$ -actin

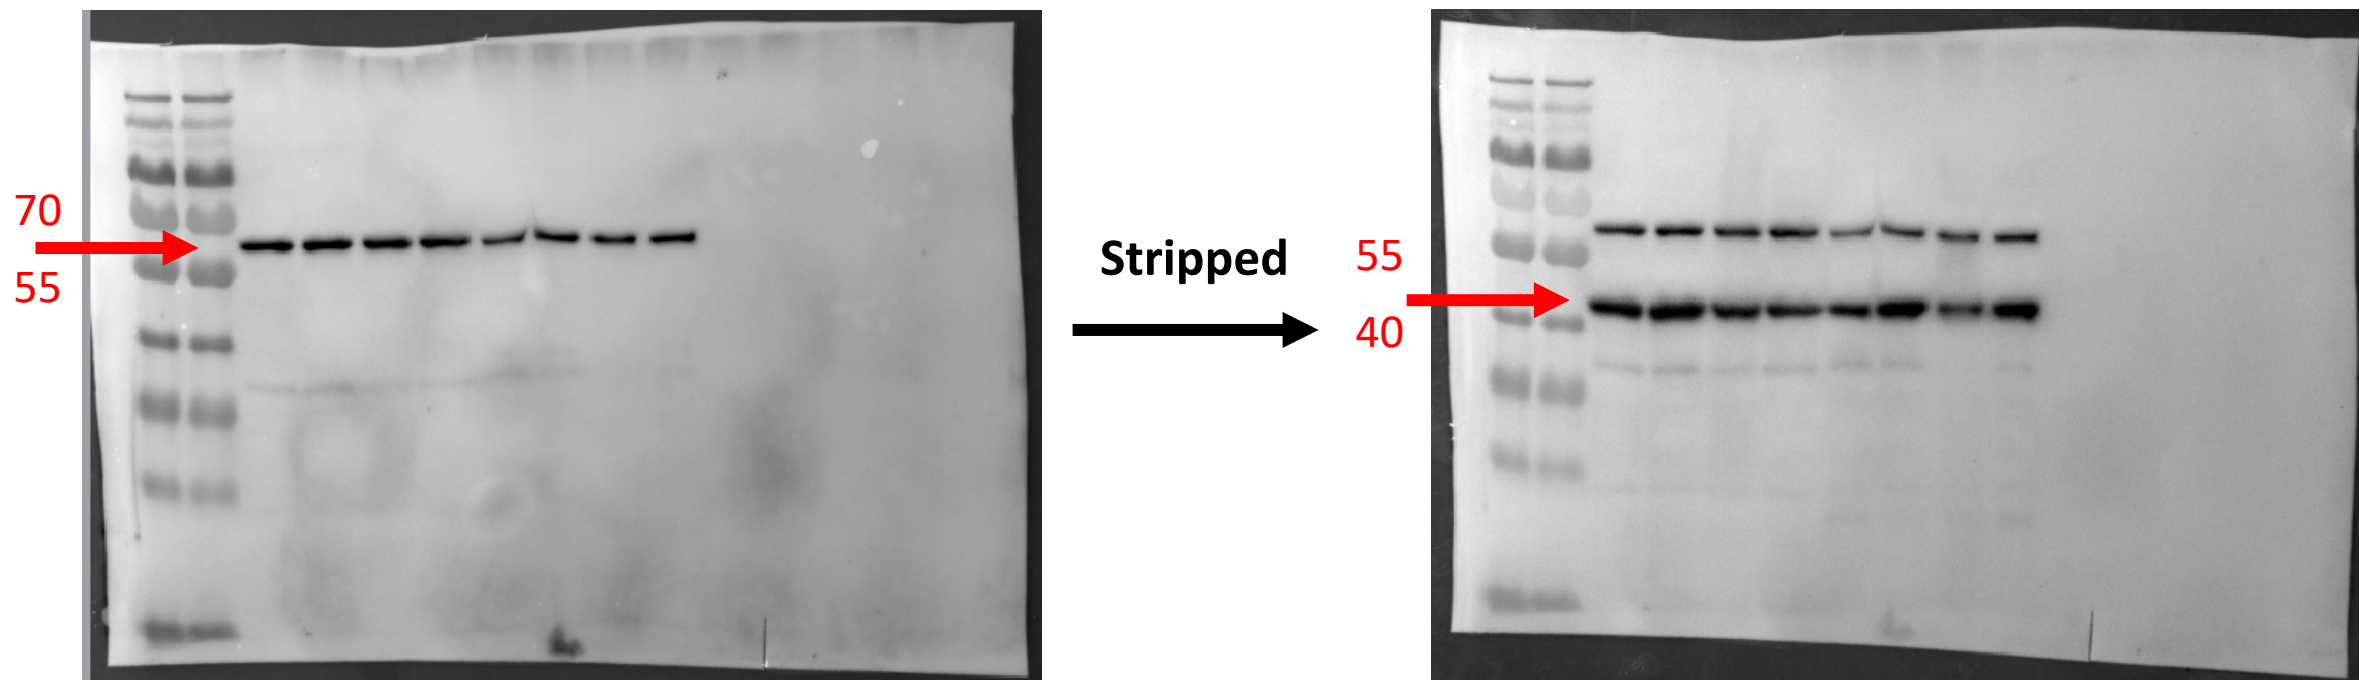

**7.5% PAGE Gel**

**PVDF2 Sample order:** protein ladder 1/2, control 5/6/7/8, LPS 5/6/7/8

**Fig 3 D**

SOD1

$\beta$ -actin

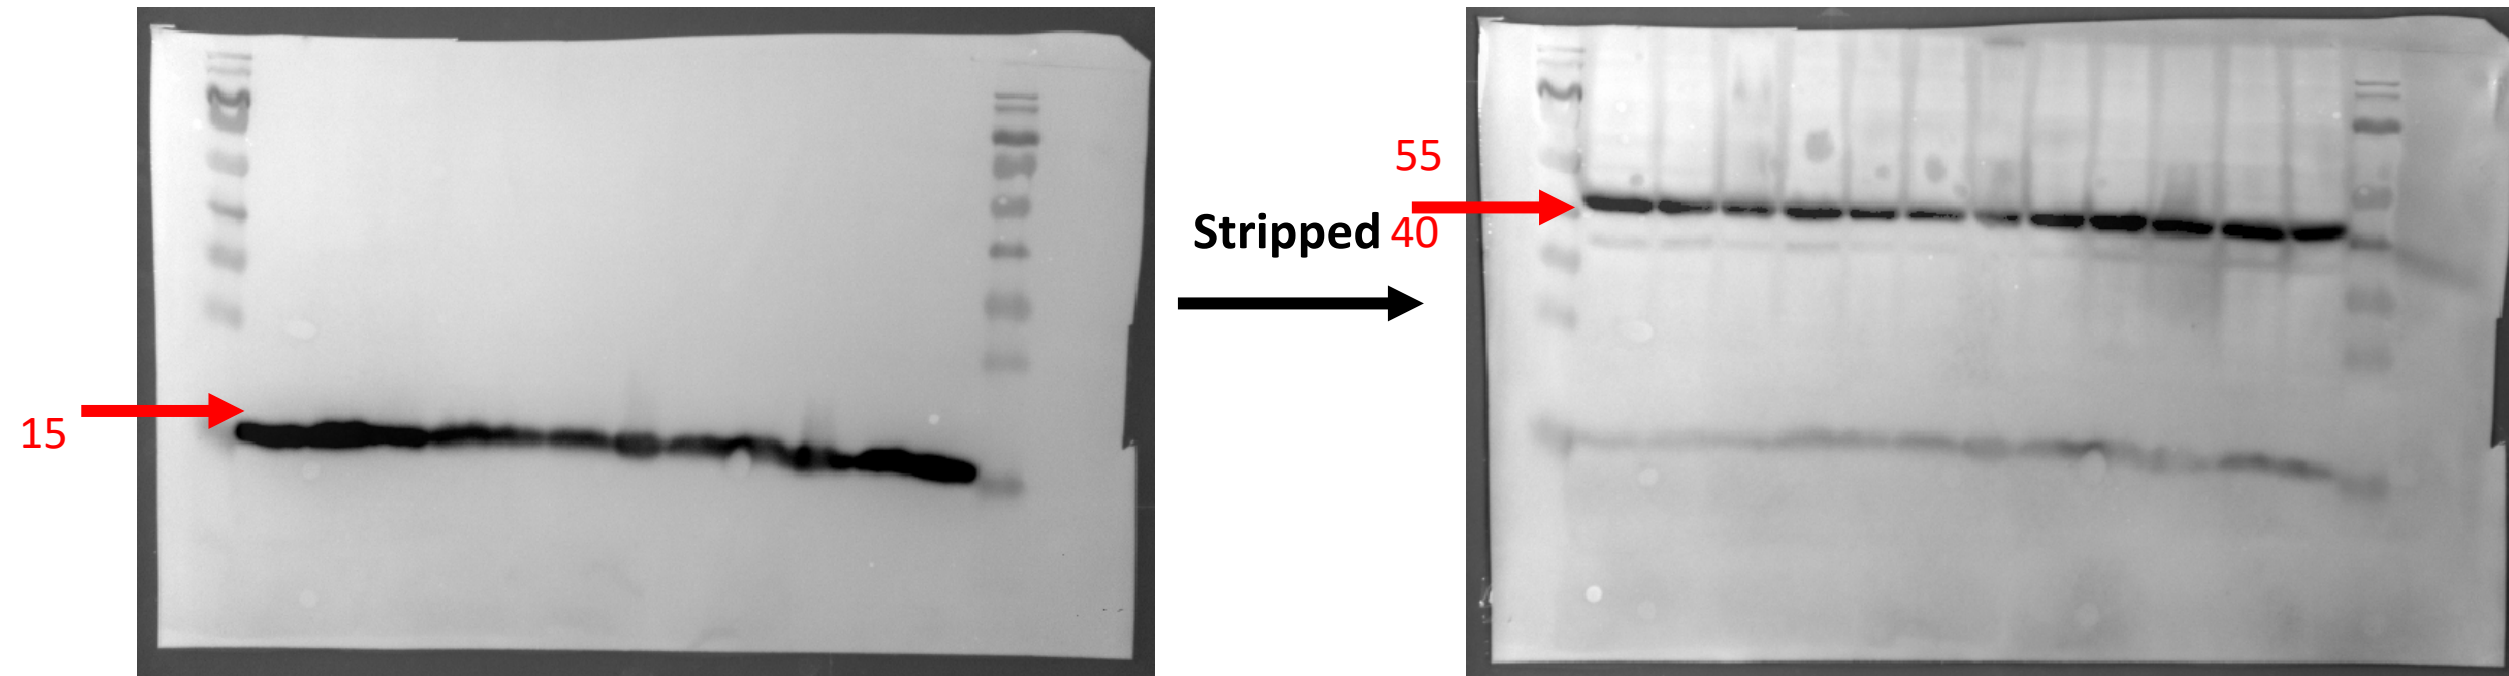

**12.5% PAGE Gel**

**PVDF1 Sample order:** protein ladder, control 1/2/3/4, LPS 1/2/3/4, DY131+LPS 1/2/3/4

**Fig 3 D**

SOD1

$\beta$ -actin

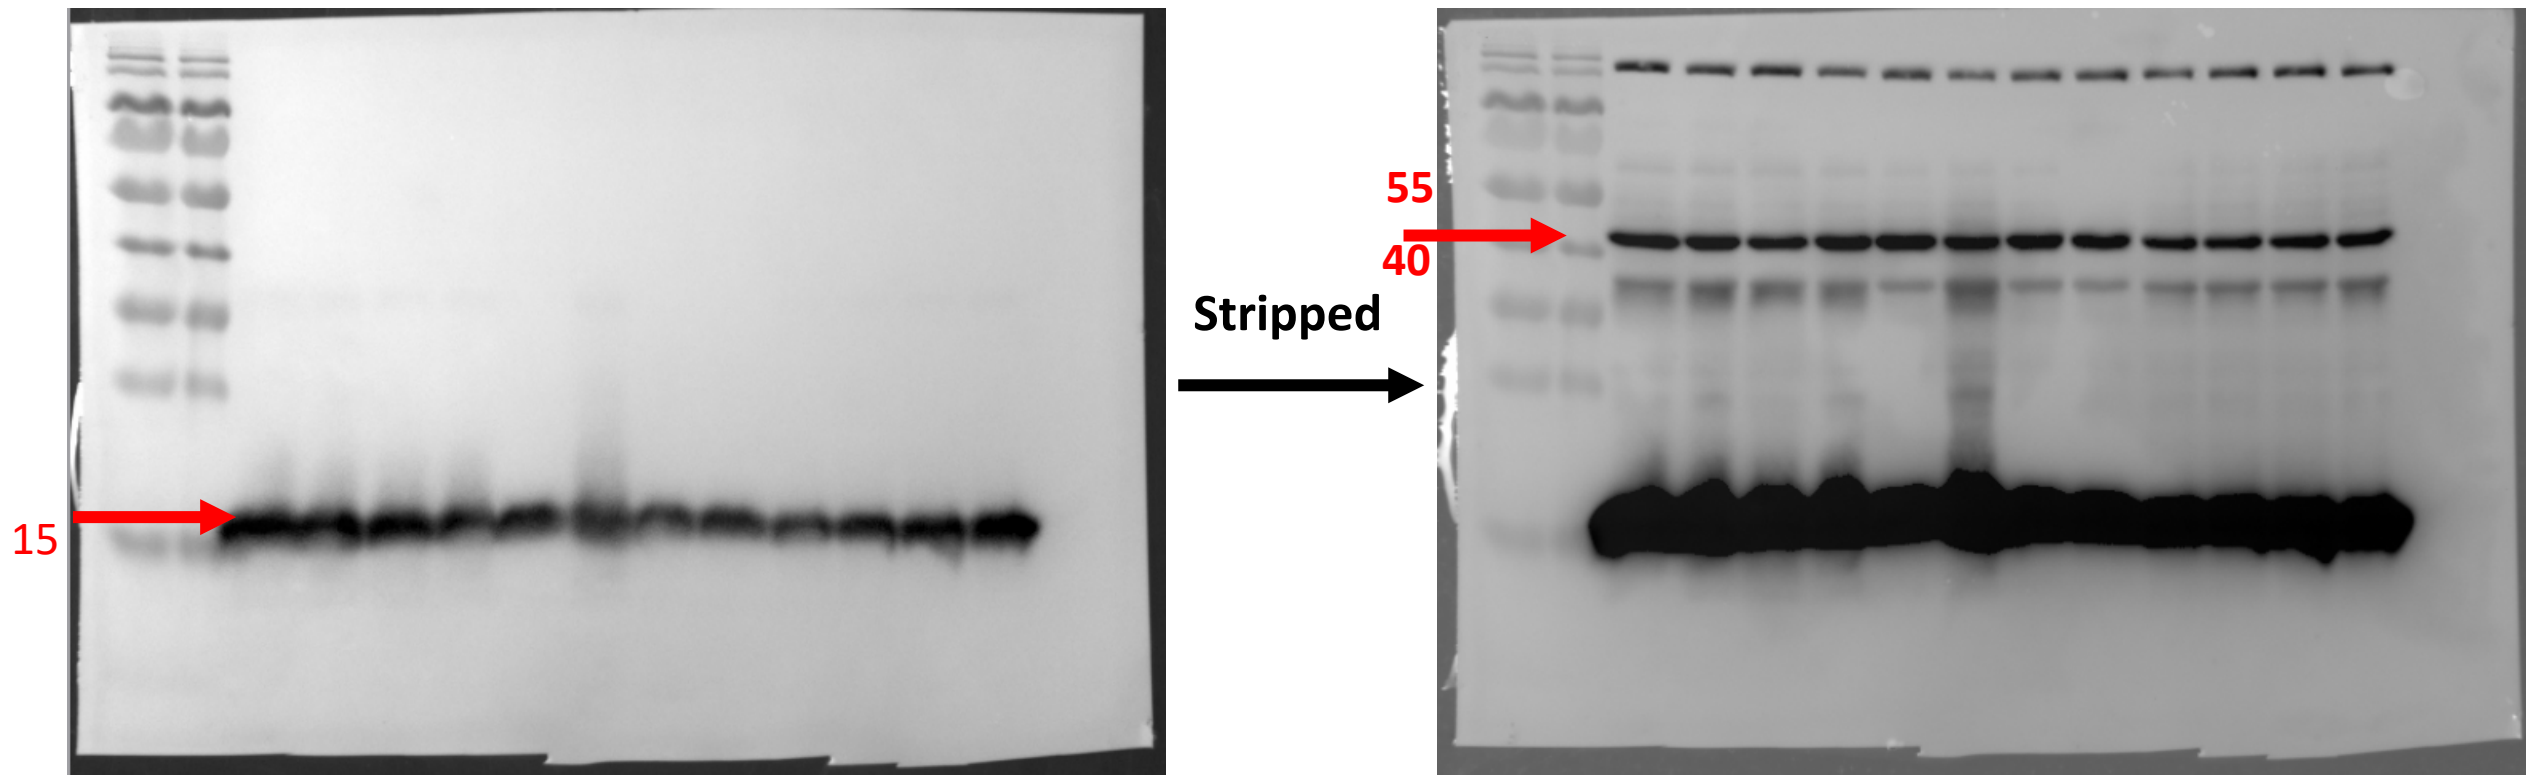

**12.5% PAGE Gel**

**PVDF2 Sample order:** protein ladder 1/2, control 5/6/7/8, LPS 5/6/7/8, DY131+LPS 5/6/7/8



**Fig 3 D**

SOD2

$\beta$ -actin

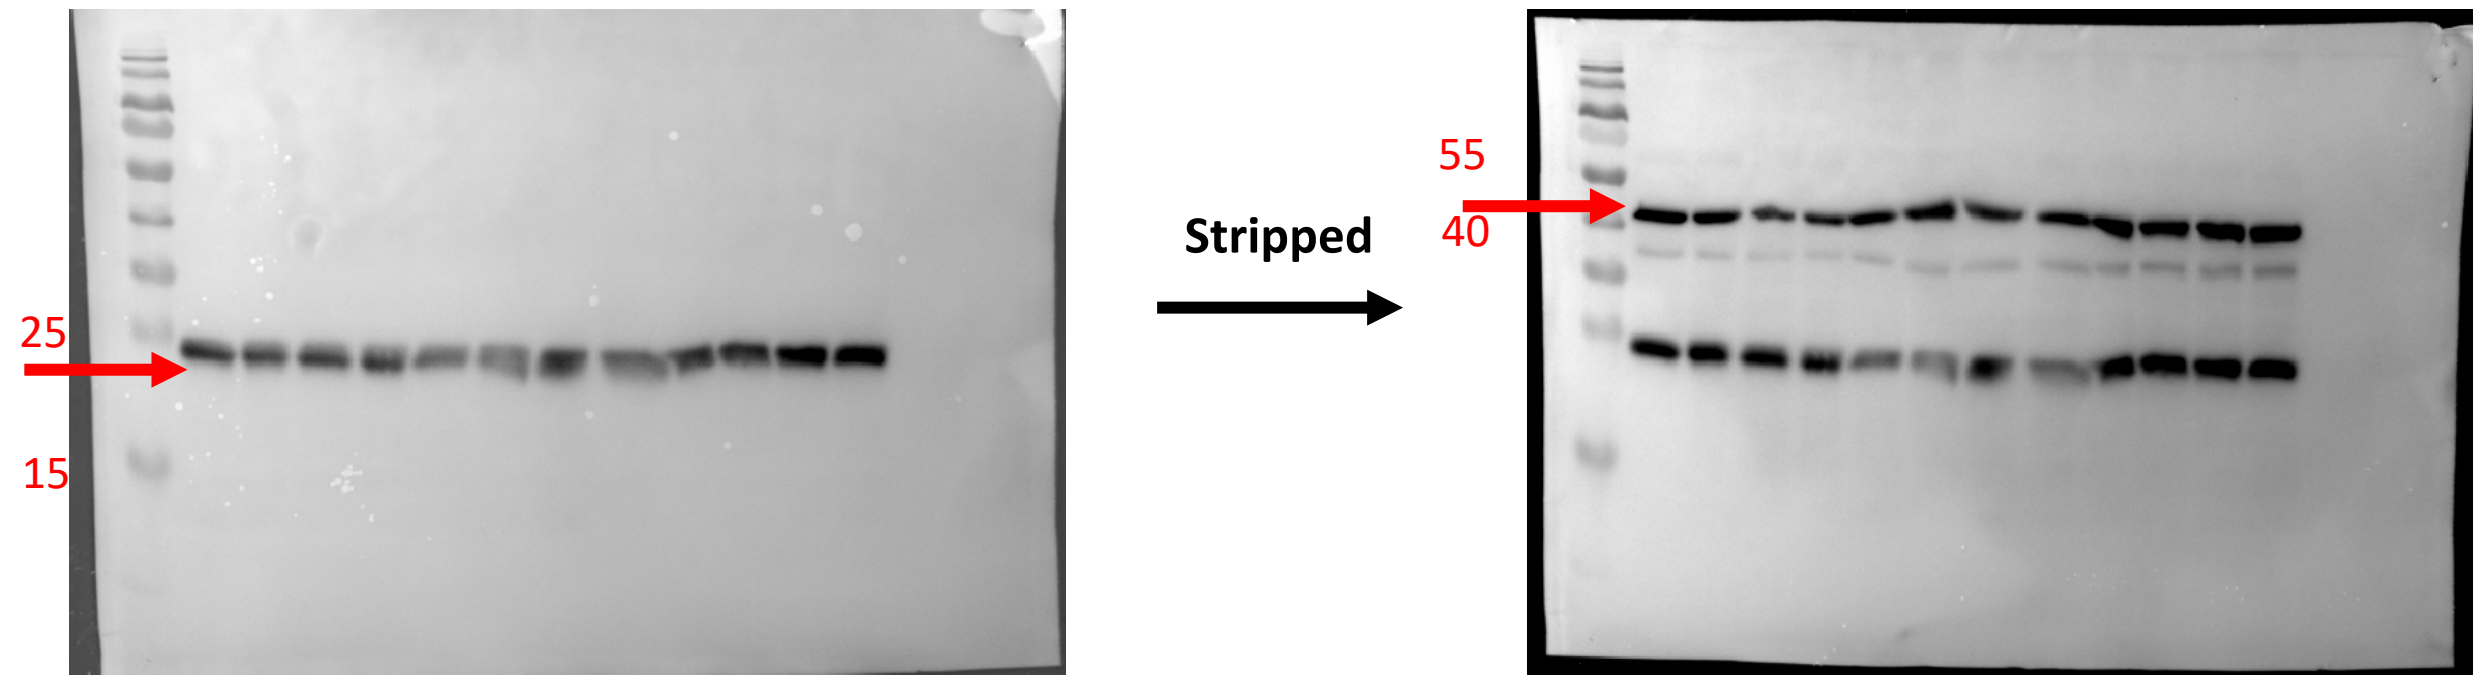

**12.5% PAGE Gel**

**PVDF1 Sample order:** protein ladder, control 1/2/3/4, LPS 1/2/3/4, DY131+LPS 1/2/3/4

**Fig 3 D**

SOD2

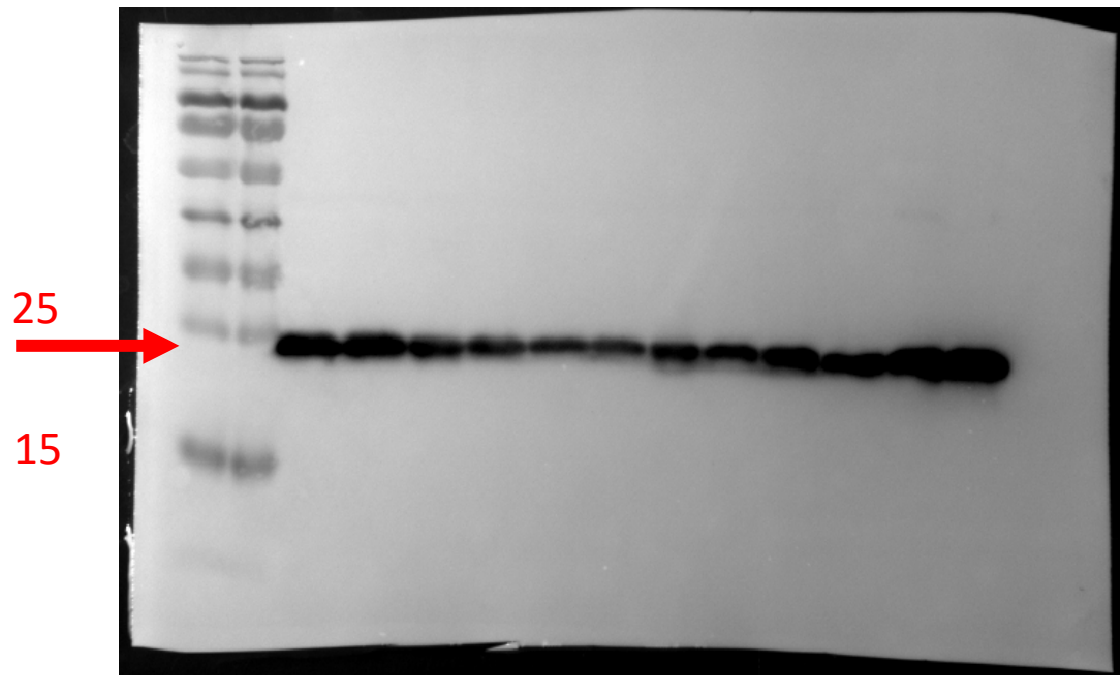

$\beta$ -actin

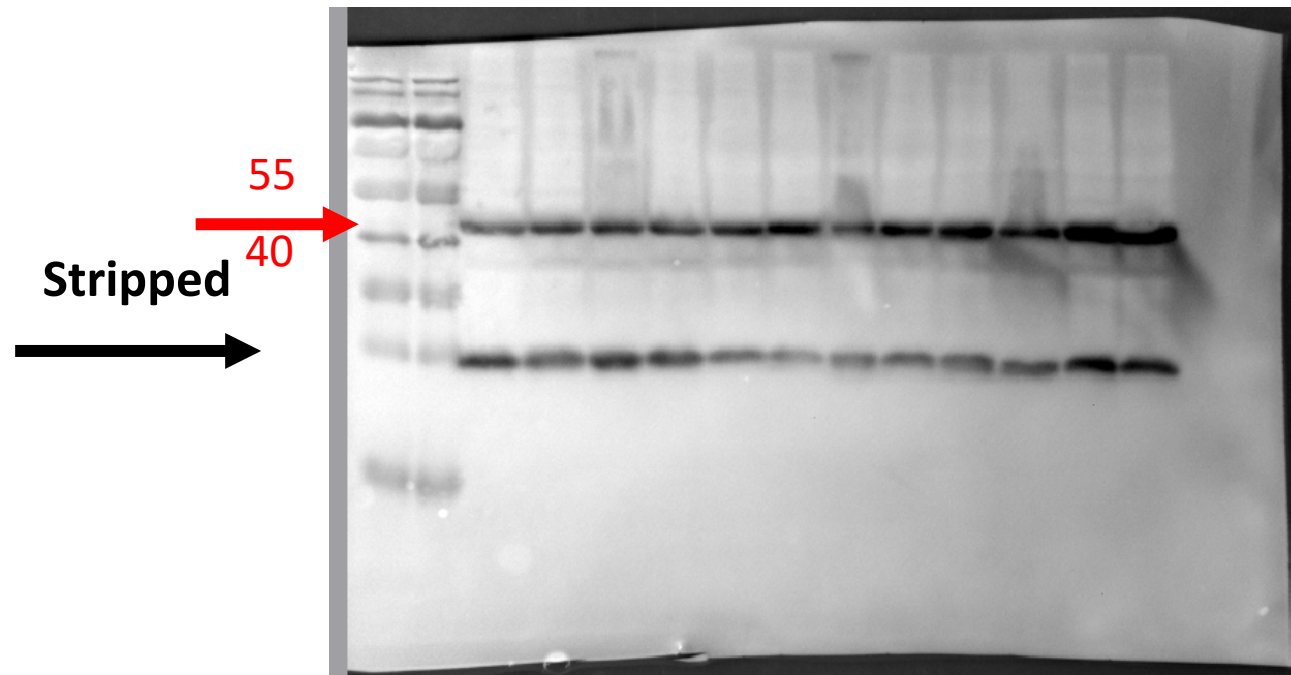

**12.5% PAGE Gel**

**PVDF2 Sample order:** protein ladder 1/2, control 5/6/7/8, LPS 5/6/7/8, DY131+LPS 5/6/7/8

**Fig 3 D**

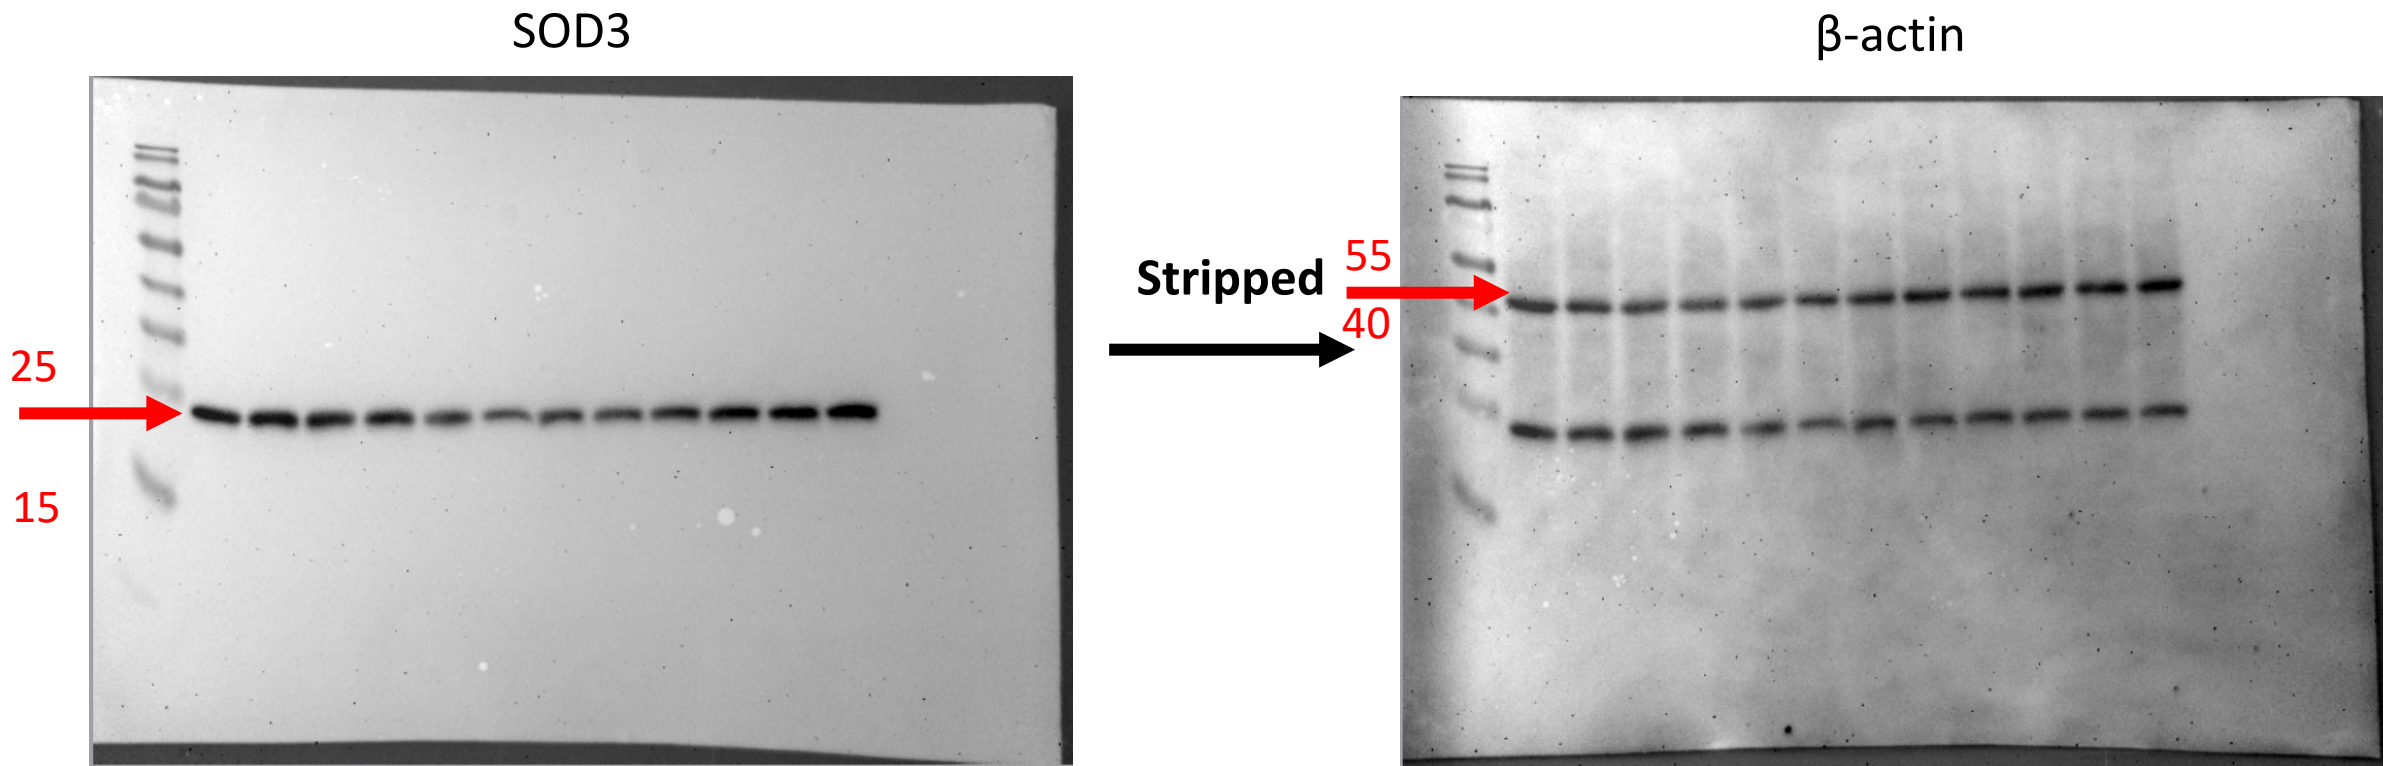

**12.5% PAGE Gel**

**PVDF1 Sample order:** protein ladder, control 1/2/3/4, LPS 1/2/3/4, DY131+LPS 1/2/3/4

**Fig 3 D**

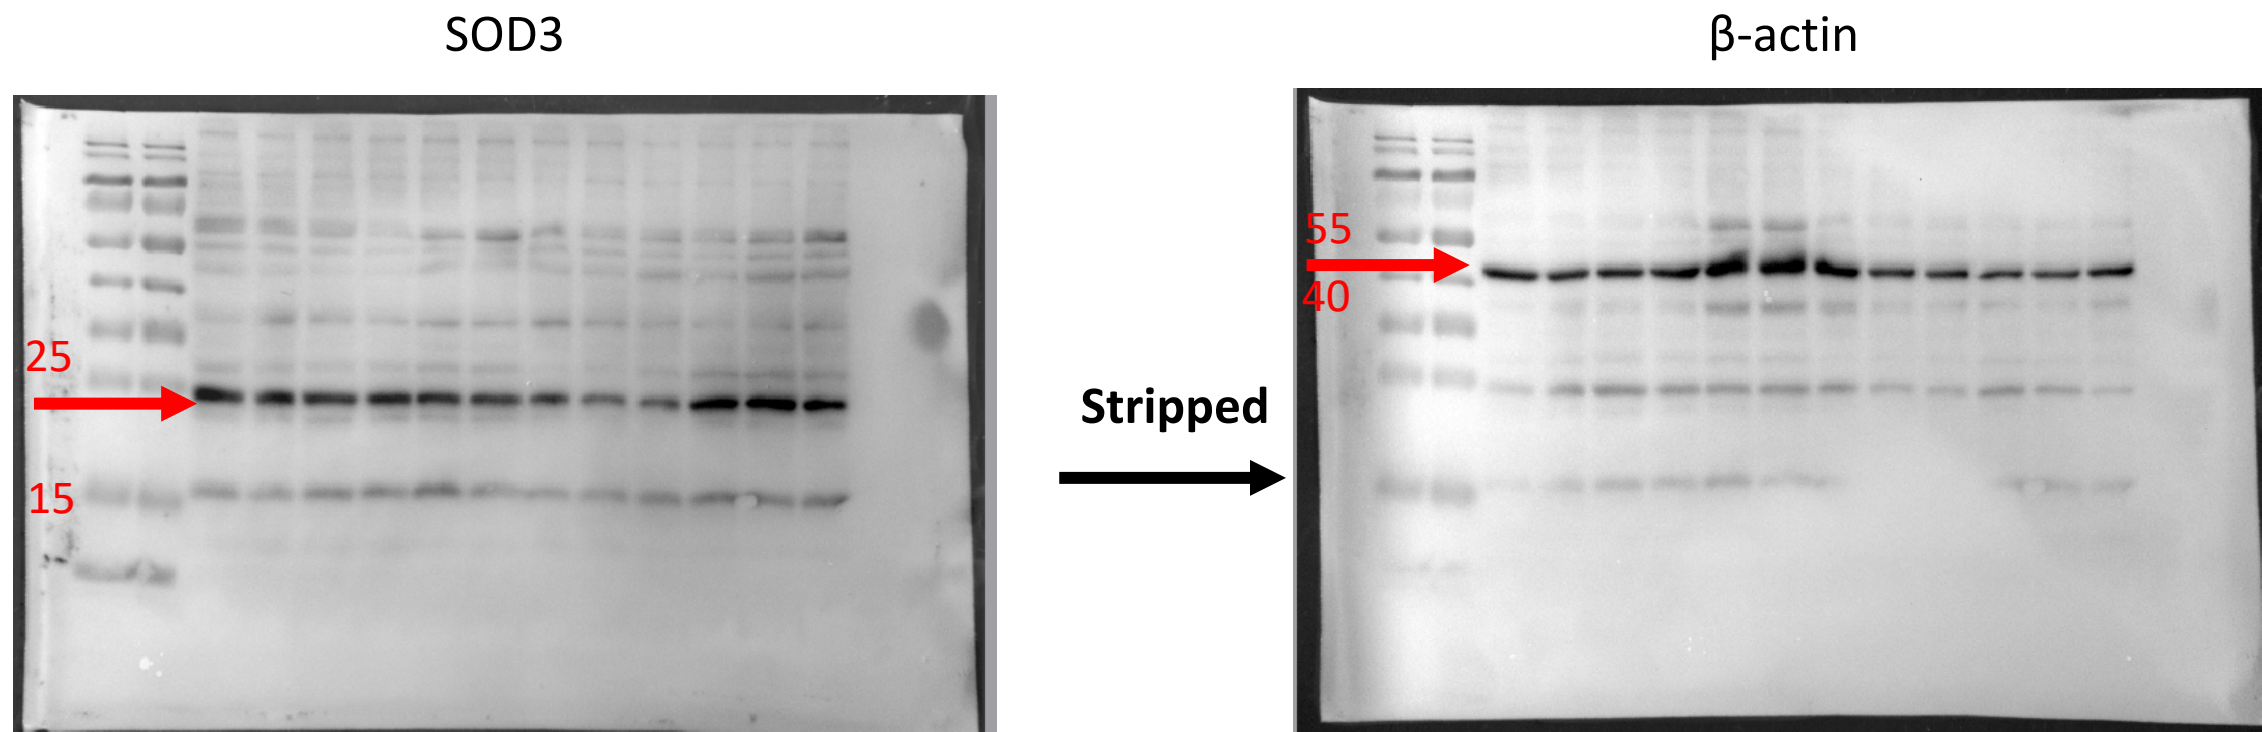

**12.5% PAGE Gel**

**PVDF2 Sample order:** protein ladder 1/2, control 5/6/7/8, LPS 5/6/7/8, DY131+LPS 5/6/7/8



**Fig 5 B**

Cleaved caspase-3

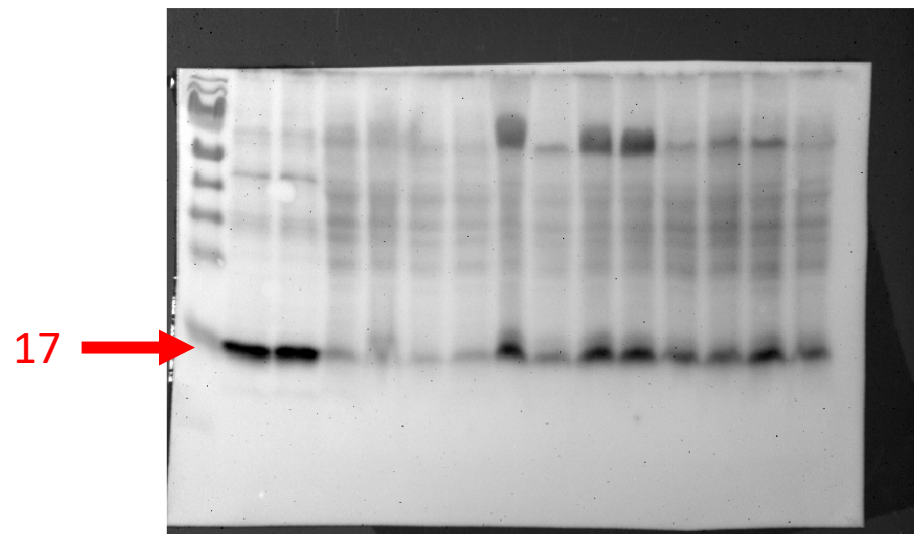

Stripped

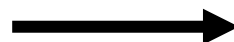

$\beta$ -actin

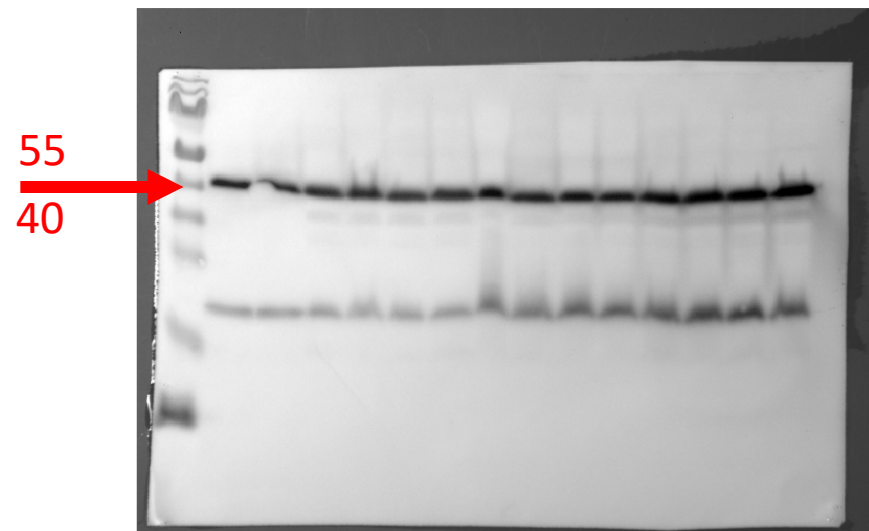

**12.5% PAGE Gel**

**PVDF1 Sample order:** protein ladder,  
positive control 1/2,  
control 1/2/3/4,  
LPS 1/2/3/4,  
DY131+LPS 1/2/3/4

Positive ctrl: cells treated with TNF cytokine (20ng/ml)

**Fig 5 B**

Cleaved caspase-3

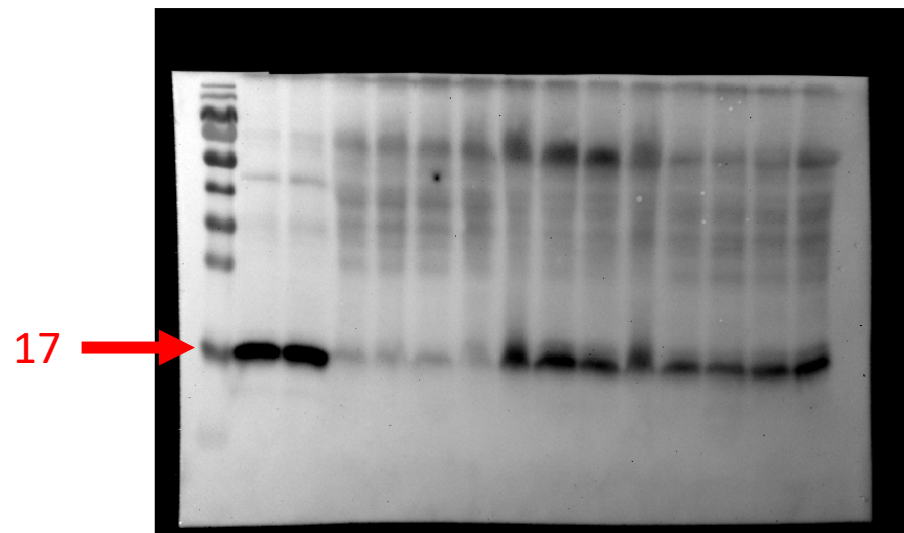

Stripped

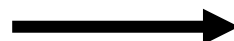

$\beta$ -actin

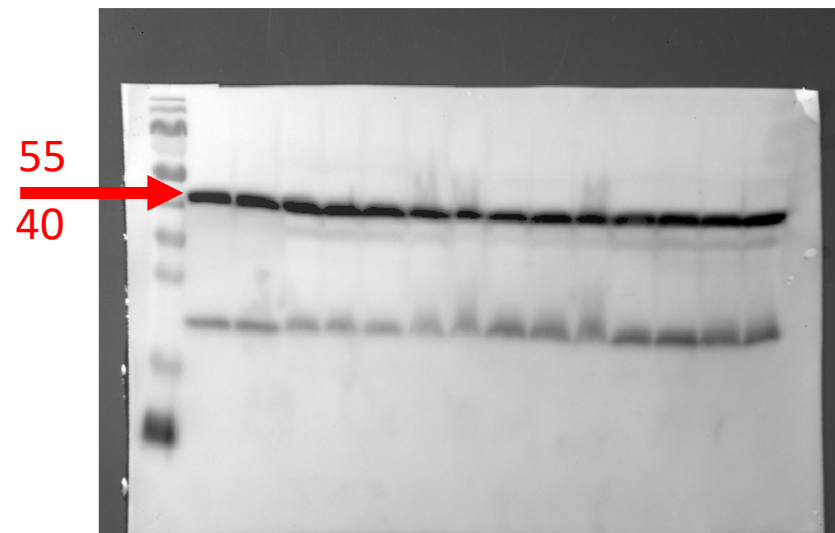

**12.5% PAGE Gel**

**PVDF2 Sample order:** protein ladder,  
positive control 1/2,  
control 5/6/7/8,  
LPS 5/6/7/8,  
DY131+LPS 5/6/7/8

Positive ctrl: cells treated with TNF cytokine (20ng/ml)

**Fig 5 B**

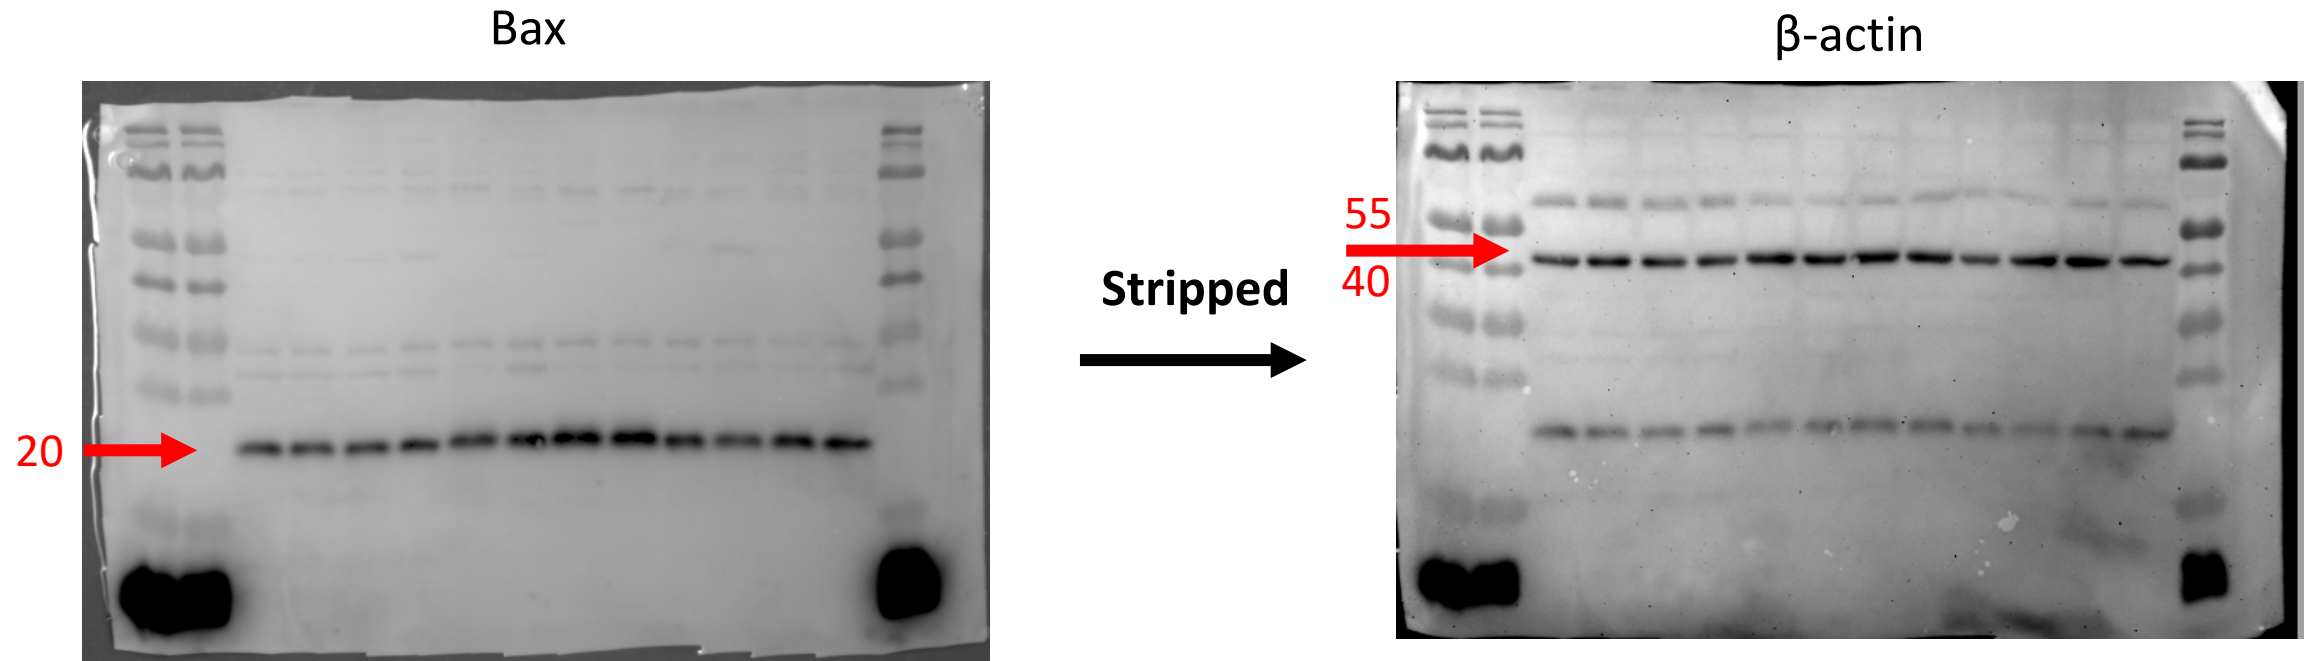

**12.5% PAGE Gel**

**PVDF1 Sample order:** protein ladder, control 1/2/3/4, LPS 1/2/3/4, DY131+LPS 1/2/3/4

**Fig 5 B**

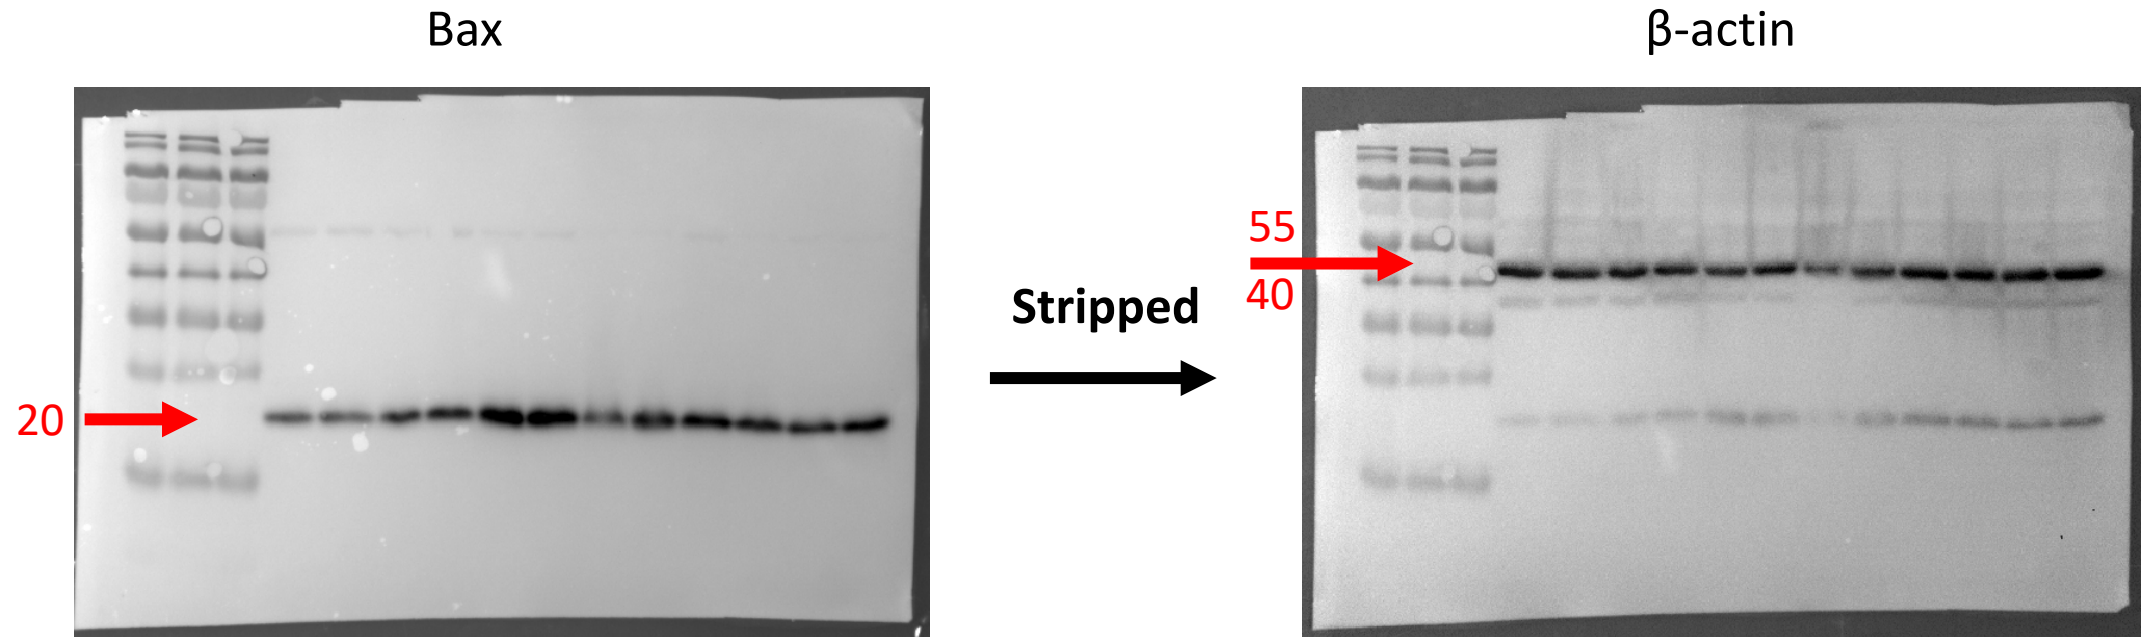

**12.5% PAGE Gel**

**PVDF2 Sample order:** protein ladder, control 5/6/7/8, LPS 5/6/7/8, DY131+LPS 5/6/7/8
